# Supplementary material
Source: PubMed Central journal article supplement (PMC4077621)
Supplement: NIHMS586855-supplement-Supplement.pdf [file NIHMS586855-supplement-Supplement.pdf]

## Online data supplement

**Supplemental Figure 1. PAR2 deficiency results in dysregulated CAR and Daf levels during myocarditis** Expression of (A) CAR and (B) DAF in control (co) and CVB3-infected wt and PAR2ko mice. Expression levels are fold to wt co (mean was set to 1). Data are mean  $\pm$  SEM. (n=6-8 mice/group). \*p<0.05 versus wt and p-value according to non parametric Brunner modeling of longitudinal data

**Supplemental Figure 2. Reduced virus replication in PAR2ko cardiomyocytes is dependent on IFN $\beta$**  Plaque titer from wt and PAR2ko cardiomyocytes after infection with CVB3 for 6 and 24h with and without adding a neutralizing IFN $\beta$  antibody. Each symbol represents the virus load (pfu/ml) from an individual biological sample (n=5-9). \*p<0.05 versus wt † p<0.05 versus 24h p.i. of the respective genotype

**Supplemental Figure 3. Schematic drawing of possible interactions between PAR2 and TLR3**

Supplemental Figure 1.

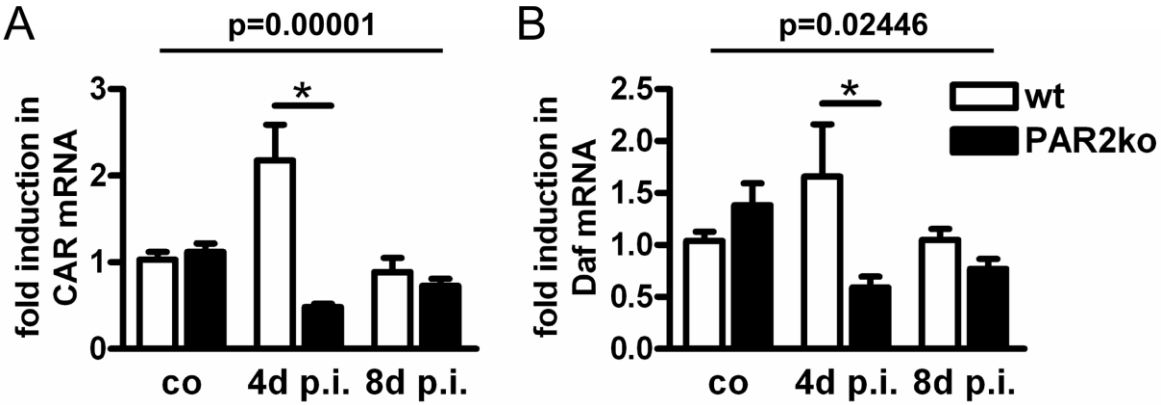

Supplemental Figure 2.

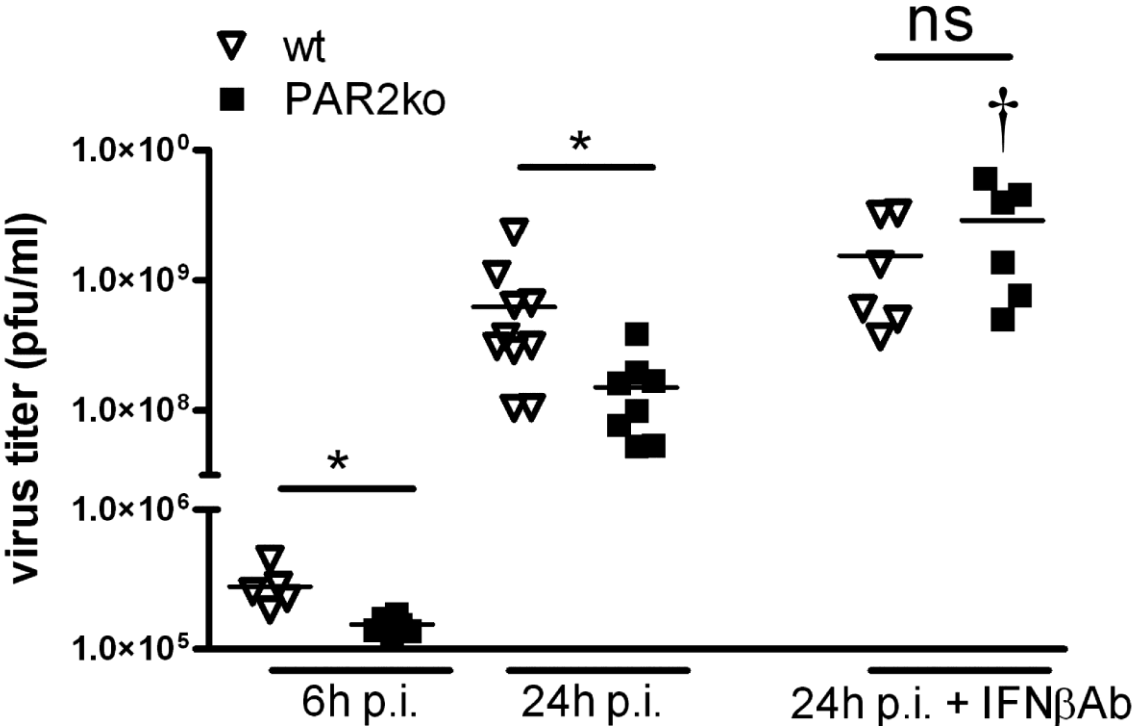

Supplemental Figure 3.

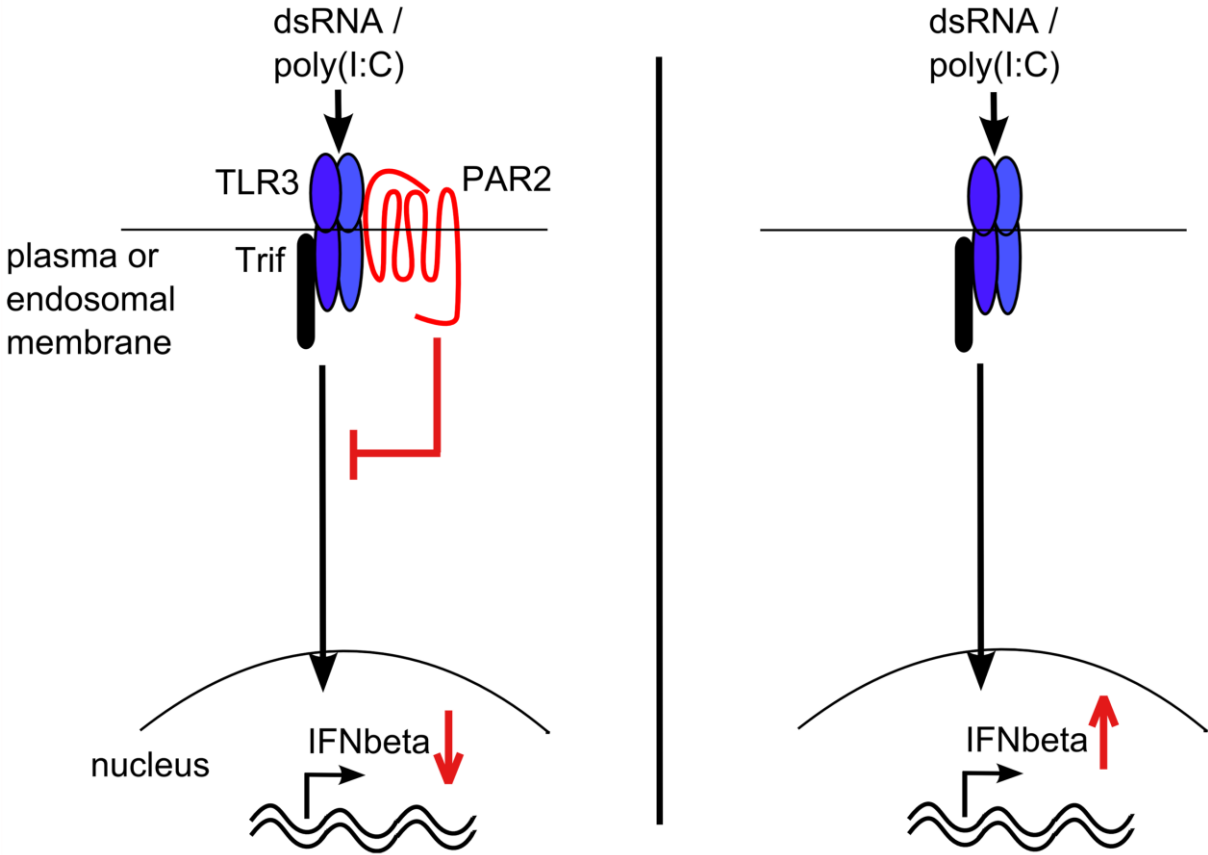

**Supplemental Table 1: Baseline characteristics of patients.**

|                                 | <b>Group 1</b> | <b>Group 2</b> |
|---------------------------------|----------------|----------------|
| <b>Sex (m/f)</b>                | 22/13          | 21/15          |
| <b>Age (years)</b>              | 53.2 ± 12.2    | 54.9 ± 12.5    |
| <b>BMI (kg/m<sup>2</sup>)</b>   | 26.3 ± 4.9     | 26.1 ± 4.8     |
| <b>LVEF (%)</b>                 | 41.5 ± 12.7    | 31.4 ± 9.7*    |
| <b>LVEDD (mm)</b>               | 58.9 ± 11.5    | 58.1 ± 8.3     |
| <b>CD3 (n/mm<sup>2</sup>)</b>   | 3.5 ± 2.4      | 8.5 ± 5.3*     |
| <b>CD45 (n/mm<sup>2</sup>)</b>  | 12.3 ± 8.3     | 22.8 ± 15.2*   |
| <b>Mac-1 (n/mm<sup>2</sup>)</b> | 27.9 ± 18.6    | 36.9 ± 17.1*   |
| <b>LFA-1 (n/mm<sup>2</sup>)</b> | 10.3 ± 5.6     | 17.5 ± 12.2*   |
| <b>HLA (n/ mm<sup>2</sup>)</b>  | 5.2 ± 2.0      | 6.5 ± 2.7 *    |
| <b>ICAM-1 (AF/%)</b>            | 1.4 ± 0.9      | 2.3 ± 1.2*     |
| <b>VCAM-1 (AF/%)</b>            | 0.05 ± 0.05    | 0.07 ± 0.1     |
| <b>Creatinine (mg/dL)</b>       | 0.9 ± 0.15     | 0.94 ± 0.20    |
| <b>Creatin Kinase (mg/dL)</b>   | 98.9 ± 134     | 109.1 ± 109    |
| <b>Hemoglobin (g/dL)</b>        | 14.2 ± 1.3     | 14.1 ± 1.5     |
| <b>Leukocytes (n/nL)</b>        | 7.96 ± 2.2     | 7.81 ± 2.09    |
| <b>Platelets (n/nL)</b>         | 255 ± 92       | 259 ± 81       |

Data are as mean  $\pm$  SD. Patients were divided according to cardiac PAR2 expression into group 1 (low expression, n=35) and group 2 (high expression, n=36). \*p>0.05 versus high PAR2 expression

**Supplemental Table 2: Haemodynamic parameters of wt and PAR2ko mice 28d p.i.**

|                              | wt-co       | wt-CVB3     | PAR2ko-co   | PAR2ko-CVB3          |
|------------------------------|-------------|-------------|-------------|----------------------|
| <b>HW/BW (mg/g)</b>          | 4.7±0.1     | 5.9±0.8†    | 5.1±0.2     | 5.6±0.5 <sup>§</sup> |
| <b>global heart function</b> |             |             |             |                      |
| <b>HR (bpm)</b>              | 515.8±47.5  | 381±75.3†   | 519.3±36.6  | 502.7±68.7           |
| <b>SV (µl)</b>               | 37.24±12.45 | 42.10±12.30 | 44.36±9.46  | 44.58±13.69          |
| <b>CO (µl/min)</b>           | 21733±5719  | 17203±3044  | 23078±5288  | 24720±4434*          |
| <b>EF (%)</b>                | 69.69±7.74  | 64.36±5.93  | 64.08±12.96 | 69.27±20.08          |
| <b>systolic function</b>     |             |             |             |                      |
| <b>dP/dtmax (mmHg/s)</b>     | 7747±1294   | 3963±1400†  | 6747±1280   | 5509±1913            |
| <b>diastolic function</b>    |             |             |             |                      |
| <b>dP/dtmin (mmHg/s)</b>     | -5684±878   | -2596±911†  | -4916±844   | -3761±11227          |
| <b>Tau (ms)</b>              | 11.13±1.33  | 14.53±2.21† | 11.54±1.79  | 10.60±1.78           |

Data are mean ± SEM. (n=6-8 mice/group). Data were analyzed by Mann-Whitney Test. \*p<0.05 versus wt and † p<0.05 versus co mice of the respective genotype.

HW/BW (heart weight/body weight), HR (heart rate), SV (stroke volume), CO (cardiac output), EF (ejection fraction), dP/dtmax (contractility), dP/dtmin (maximum rate of pressure change), Tau (isovolumic relaxation).
